# Supplementary material for: Batrachochytrium salamandrivorans Threat to the Iberian Urodele Hotspot
Source: MDPI journal article supplement (doi:10.3390/jof7080644), 2021-08-07
Supplement: s1 [file s1]

Table S1: Sampling of Spanish urodeles for the presence of Bsal between 2015 and 2021. Car = *Calotriton arnoldi*, Ca = *Calotriton asper*, Cl = *Chioglossa lusitanica*, Ia = *Ichthyosaura alpestris*, Lb = *Lissotriton boscai*, Lh = *Lissotriton helveticus*, Pw = *Pleurodeles waltli*, Ss = *Salamandra salamandra*, Tm = *Triturus marmoratus*, Tp = *Triturus pygmaeus*.

| Province_site | Year | Species | N  | Bsal status   | Sample type | Observations |
|---------------|------|---------|----|---------------|-------------|--------------|
| Asturias_01   | 2015 | Ia      | 5  | Bsal negative | Toe-clip    |              |
| Asturias_02   | 2019 | Ia      | 20 | Bsal negative | Swab        |              |
| Asturias_03   | 2019 | Lb      | 11 | Bsal negative | Swab        |              |
| Asturias_03   | 2019 | Cl      | 1  | Bsal negative | Swab        |              |
| Asturias_04   | 2019 | Ss      | 10 | Bsal negative | Swab        |              |
| Asturias_05   | 2020 | Lh      | 3  | Bsal negative | Swab        |              |
| Asturias_05   | 2020 | Tm      | 9  | Bsal negative | Swab        |              |
| Asturias_06   | 2020 | Lh      | 15 | Bsal negative | Swab        |              |
| Asturias_07   | 2020 | Lh      | 8  | Bsal negative | Swab        |              |
| Asturias_07   | 2020 | Tm      | 7  | Bsal negative | Swab        |              |
| Asturias_08   | 2020 | Lh      | 6  | Bsal negative | Swab        |              |
| Asturias_08   | 2020 | Tm      | 7  | Bsal negative | Swab        |              |
| Asturias_09   | 2020 | Lh      | 8  | Bsal negative | Swab        |              |
| Asturias_09   | 2020 | Ia      | 8  | Bsal negative | Swab        |              |
| Asturias_09   | 2020 | Tm      | 1  | Bsal negative | Swab        |              |
| Asturias_10   | 2020 | Ia      | 12 | Bsal negative | Swab        |              |
| Asturias_11   | 2020 | Lh      | 21 | Bsal negative | Swab        |              |
| Asturias_11   | 2020 | Tm      | 1  | Bsal negative | Swab        |              |
| Asturias_12   | 2020 | Lh      | 19 | Bsal negative | Swab        |              |
| Asturias_13   | 2020 | Ia      | 19 | Bsal negative | Swab        |              |
| Asturias_13   | 2020 | Ss      | 9  | Bsal negative | Swab        |              |
| Asturias_14   | 2020 | Lh      | 15 | Bsal negative | Swab        |              |
| Asturias_15   | 2015 | Ia      | 4  | Bsal negative | Toe-clip    |              |
| Asturias_15   | 2020 | Ia      | 11 | Bsal negative | Swab        |              |
| Asturias_16   | 2020 | Lh      | 10 | Bsal negative | Swab        |              |
| Asturias_17   | 2020 | Lh      | 2  | Bsal negative | Swab        |              |
| Asturias_17   | 2020 | Ia      | 7  | Bsal negative | Swab        |              |
| Asturias_18   | 2021 | Lh      | 1  | Bsal negative | Swab        |              |
| Asturias_18   | 2021 | Ss      | 20 | Bsal negative | Swab        |              |
| Asturias_19   | 2021 | Lh      | 2  | Bsal negative | Swab        |              |
| Asturias_19   | 2021 | Tm      | 2  | Bsal negative | Swab        |              |
| Asturias_20   | 2021 | Tm      | 12 | Bsal negative | Swab        |              |
| Asturias_21   | 2021 | Ss      | 20 | Bsal negative | Swab        |              |
| Asturias_21   | 2021 | Cl      | 20 | Bsal negative | Swab        |              |
| Burgos_01     | 2017 | Ss      | 7  | Bsal negative | Toe-clip    | Carcasses    |
| Burgos_02     | 2020 | Ss      | 2  | Bsal negative | Toe-clip    | Carcasses    |
| Burgos_02     | 2020 | Tm      | 2  | Bsal negative | Toe-clip    | Carcasses    |
| Cantabria_01  | 2015 | Ia      | 4  | Bsal negative | Toe-clip    |              |

|               |      |     |     |               |           |           |
|---------------|------|-----|-----|---------------|-----------|-----------|
| Cantabria_02  | 2020 | Ia  | 14  | Bsal negative | Swab      |           |
| Catalunya_01  | 2020 | Car | 200 | Bsal negative | Toe-clip  |           |
| Huelva_01     | 2018 | Pw  | 46  | Bsal negative | Swab      |           |
| Huelva_01     | 2018 | Tp  | 77  | Bsal negative | Swab      |           |
| Huesca_01     | 2020 | Ca  | 26  | Bsal negative | Swab      |           |
| Huesca_02     | 2020 | Ca  | 7   | Bsal negative | Swab      |           |
| Huesca_03     | 2020 | Ca  | 17  | Bsal negative | Swab      |           |
| Huesca_04     | 2020 | Ca  | 10  | Bsal negative | Swab      |           |
| León_01       | 2015 | Ia  | 5   | Bsal negative | Toe-clip  |           |
| León_02       | 2018 | Ss  | 20  | Bsal negative | Swab      |           |
| León_03       | 2019 | Ia  | 18  | Bsal negative | Tail-clip |           |
| León_03       | 2019 | Lh  | 1   | Bsal negative | Tail-clip |           |
| León_04       | 2020 | Ss  | 19  | Bsal negative | Swab      |           |
| León_05       | 2020 | Lh  | 22  | Bsal negative | Swab      |           |
| Lérida_01     | 2020 | Ca  | 20  | Bsal negative | Swab      |           |
| Lérida_02     | 2020 | Ca  | 20  | Bsal negative | Swab      |           |
| Madrid_01     | 2015 | Ia  | 5   | Bsal negative | Toe-clip  |           |
| Madrid_01     | 2018 | Ss  | 8   | Bsal negative | Swab      |           |
| Navarra_01    | 2015 | Ia  | 4   | Bsal negative | Swab      |           |
| Navarra_02    | 2020 | Lh  | 5   | Bsal negative | Toe-clip  | Carcasses |
| Ourense_01    | 2020 | Lb  | 20  | Bsal negative | Swab      |           |
| Ourense_02    | 2021 | Lb  | 15  | Bsal negative | Swab      |           |
| Pontevedra_01 | 2020 | Lb  | 4   | Bsal negative | Swab      |           |
| Pontevedra_01 | 2020 | Lh  | 8   | Bsal negative | Swab      |           |
| Pontevedra_01 | 2020 | Ss  | 18  | Bsal negative | Swab      |           |
| Pontevedra_02 | 2020 | Tm  | 10  | Bsal negative | Swab      |           |
| Pontevedra_02 | 2020 | Lb  | 3   | Bsal negative | Swab      |           |
| Pontevedra_02 | 2020 | Lh  | 8   | Bsal negative | Swab      |           |
| Pontevedra_02 | 2020 | Ss  | 2   | Bsal negative | Swab      |           |
| Pontevedra_03 | 2020 | Tm  | 16  | Bsal negative | Swab      |           |
| Pontevedra_03 | 2020 | Ss  | 29  | Bsal negative | Swab      |           |
| Pontevedra_03 | 2020 | Lb  | 2   | Bsal negative | Swab      |           |
| Pontevedra_04 | 2020 | Lb  | 20  | Bsal negative | Swab      |           |
| Pontevedra_04 | 2020 | Ss  | 1   | Bsal negative | Swab      |           |
| Pontevedra_05 | 2020 | Tm  | 1   | Bsal negative | Swab      |           |
| Pontevedra_05 | 2020 | Lb  | 1   | Bsal negative | Swab      |           |
| Pontevedra_05 | 2020 | Lh  | 4   | Bsal negative | Swab      |           |
| Pontevedra_05 | 2020 | Ss  | 3   | Bsal negative | Swab      |           |
| Pontevedra_06 | 2020 | Lb  | 4   | Bsal negative | Swab      |           |
| Pontevedra_06 | 2020 | Tm  | 18  | Bsal negative | Swab      |           |
| Pontevedra_06 | 2020 | Cl  | 4   | Bsal negative | Swab      |           |
| Pontevedra_06 | 2021 | Cl  | 7   | Bsal negative | Swab      |           |

|               |      |    |    |               |          |           |
|---------------|------|----|----|---------------|----------|-----------|
| Pontevedra_07 | 2020 | Lb | 22 | Bsal negative | Swab     |           |
| Pontevedra_07 | 2021 | Cl | 1  | Bsal negative | Swab     |           |
| Pontevedra_08 | 2020 | Tm | 1  | Bsal negative | Swab     |           |
| Pontevedra_08 | 2020 | Lh | 23 | Bsal negative | Swab     |           |
| Pontevedra_09 | 2020 | Tm | 14 | Bsal negative | Swab     |           |
| Pontevedra_09 | 2020 | Lb | 5  | Bsal negative | Swab     |           |
| Pontevedra_09 | 2020 | Cl | 1  | Bsal negative | Swab     |           |
| Pontevedra_10 | 2020 | Lb | 16 | Bsal negative | Swab     |           |
| Pontevedra_10 | 2020 | Tm | 6  | Bsal negative | Swab     |           |
| Pontevedra_11 | 2020 | Tm | 18 | Bsal negative | Swab     |           |
| Pontevedra_12 | 2020 | Lb | 8  | Bsal negative | Swab     |           |
| Pontevedra_13 | 2020 | Lb | 20 | Bsal negative | Swab     |           |
| Pontevedra_14 | 2020 | Tm | 6  | Bsal negative | Swab     |           |
| Pontevedra_14 | 2020 | Lb | 17 | Bsal negative | Swab     |           |
| Pontevedra_15 | 2020 | Tm | 2  | Bsal negative | Swab     |           |
| Pontevedra_15 | 2020 | Lh | 3  | Bsal negative | Swab     |           |
| Pontevedra_16 | 2020 | Cl | 1  | Bsal negative | Swab     |           |
| Pontevedra_17 | 2021 | Tm | 6  | Bsal negative | Swab     |           |
| Pontevedra_17 | 2021 | Lb | 19 | Bsal negative | Swab     |           |
| Pontevedra_18 | 2021 | Tm | 7  | Bsal negative | Swab     |           |
| Pontevedra_18 | 2021 | Lb | 14 | Bsal negative | Swab     |           |
| Pontevedra_19 | 2021 | Lh | 53 | Bsal negative | Swab     |           |
| Pontevedra_19 | 2021 | Lb | 1  | Bsal negative | Swab     |           |
| Pontevedra_20 | 2021 | Cl | 2  | Bsal negative | Swab     |           |
| Salamanca_01  | 2018 | Pw | 2  | Bsal negative | Toe-clip |           |
| Salamanca_01  | 2018 | Lb | 2  | Bsal negative | Toe-clip |           |
| Salamanca_01  | 2018 | Tm | 2  | Bsal negative | Toe-clip |           |
| Soria_01      | 2021 | Lh | 2  | Bsal negative | Toe-clip | Carcasses |
| Soria_01      | 2021 | Tm | 3  | Bsal negative | Toe-clip | Carcasses |
| Zamora_01     | 2018 | Pw | 32 | Bsal negative | Toe-clip |           |
| Zamora_01     | 2018 | Tm | 3  | Bsal negative | Toe-clip |           |

**Table S2.** Susceptibility estimate of Iberian urodeles. Estimates are based on results from lab trials and mortality events in nature or captivity when available. \*indicates a high level of uncertainty, with susceptibility mainly inferred from that of its sister species and (for *T. pygmaeus*) extensive mortality during a Bsal outbreak in captivity. \*\*indicates an invasive species

| Species                       | Death rate after experimental infection (infected) | Inoculum        | Bsal isolate | Mortality in nature / captivity | Susceptibility   | Reference                                                       |
|-------------------------------|----------------------------------------------------|-----------------|--------------|---------------------------------|------------------|-----------------------------------------------------------------|
| <i>Calotriton arnoldi</i>     | 5/5                                                | 10 <sup>3</sup> | AMFP18/2     |                                 | high             | Martel et al., 2020                                             |
| <i>Calotriton asper</i>       | 0/5 (0/5)                                          | 10 <sup>3</sup> | AMFP13/1     |                                 | Low-intermediate | This study                                                      |
|                               | 0/5 (2/5)                                          | 10 <sup>3</sup> | AMFP13/1     |                                 |                  |                                                                 |
| <i>Chioglossa lusitanica</i>  | 6/6                                                | 10 <sup>3</sup> | AMFP13/1     |                                 | high             | This study                                                      |
| <i>Ichthyosaura alpestris</i> | 5/5                                                | 10 <sup>4</sup> | AMFP13/1     | Nature and captivity            | intermediate     | Martel et al., 2014; Fitzpatrick et al., Schmeller et al., 2020 |
|                               | 1/5 (2/5)                                          | 10              | AMFP13/1     |                                 |                  | Stegen et al., 2017                                             |
|                               | 1/5 (5/5)                                          | 10 <sup>2</sup> | AMFP13/1     |                                 |                  | Stegen et al., 2017                                             |
|                               | 2/5 (5/5)                                          | 10 <sup>3</sup> | AMFP13/1     |                                 |                  | Stegen et al., 2017                                             |
|                               | 5/5                                                | 10 <sup>4</sup> | AMFP13/1     |                                 |                  | Stegen et al., 2017                                             |
| <i>Lissotriton boscai</i>     | 1/5 (4/5)                                          | 10 <sup>3</sup> | AMFP13/1     | captivity                       | intermediate     | This study, Fitzpatrick et al.                                  |
| <i>Lissotriton helveticus</i> | 0/5 (0/5)                                          | 10 <sup>4</sup> | AMFP13/1     |                                 | low              | This study                                                      |
|                               | 0/5 (0/5)                                          | 10 <sup>4</sup> | AMFP14/1     |                                 |                  | This study                                                      |
|                               | 0/5 (0/5)                                          | 10 <sup>4</sup> | AMFP14/2     |                                 |                  | This study                                                      |
|                               | 0/5 (2/5)                                          | 10 <sup>4</sup> | AMFP15/1     |                                 |                  | This study                                                      |
|                               | 0/3 (3/3)                                          | 10 <sup>4</sup> | AMFP13/1     |                                 |                  | Martel et al., 2014                                             |
| <i>Lissotriton maltzani</i>   | NA                                                 |                 |              |                                 | Intermediate*    |                                                                 |

|                                             |           |                                            |                                                            |                      |              |                                                                                     |
|---------------------------------------------|-----------|--------------------------------------------|------------------------------------------------------------|----------------------|--------------|-------------------------------------------------------------------------------------|
| <i>Ommatotriton nesterovi/ophryticus</i> ** | NA        |                                            |                                                            | captivity            | high         | Fitzpatrick et al., 2018                                                            |
| <i>Pleurodeles waltl</i>                    | 3/8 (8/8) | 10 <sup>3</sup>                            | AMFP13/1                                                   |                      | intermediate | Greener et al., 2020                                                                |
|                                             | 5/5       | 10 <sup>4</sup>                            | AMFP13/1                                                   |                      |              | Martel et al., 2014                                                                 |
| <i>Salamandra salamandra</i>                | 6/6       | 10 <sup>3</sup>                            | AMFP13/1                                                   | Nature and captivity | High         | This study, Martel et al., 2013; Fitzpatrick et al., 2018; Sabino Pinto et al. 2015 |
|                                             | 9/9       | 10 <sup>3</sup>                            | AMFP13/1                                                   |                      |              | Greener et al., 2020                                                                |
|                                             | 9/9       | 10 <sup>3</sup>                            | AMFP18/2                                                   |                      |              | Martel et al., 2020                                                                 |
|                                             | 40/40     | 10 <sup>2</sup> (20); 10 <sup>4</sup> (20) | AMFP13/1 (10); AMFP14/1 (10); AMFP14/2 (10); AMFP15/1 (10) |                      |              | Stegen et al., 2017                                                                 |
|                                             | 5/5       | 10 <sup>4</sup>                            | AMFP13/1                                                   |                      |              | Martel et al., 2014                                                                 |
| <i>Triturus anatolicus</i> **               | 0/5 (2/5) | 10 <sup>3</sup>                            | AMFP18/2                                                   |                      | low          | Martel et al., 2020                                                                 |
| <i>Triturus marmoratus</i>                  | 7/7       | 10 <sup>3</sup>                            | AMFP13/1                                                   | Nature and captivity | high         | Greener et al., 2020; Fitzpatrick et al. 2018                                       |
|                                             | 7/7       | 10 <sup>3</sup>                            | AMFP18/2                                                   |                      |              | Martel et al., 2020                                                                 |
| <i>Triturus pygmaeus</i>                    | NA        |                                            |                                                            | Captivity            | High*        | Fitzpatrick et al., 2018                                                            |
